# Supplementary material for: Molecular Mechanisms of Selenium Mitigating Lead Toxicity in Chickens via Mitochondrial Pathway: Selenoproteins, Oxidative Stress, HSPs, and Apoptosis
Source: MDPI journal article supplement (doi:10.3390/toxics11090734), 2023-08-25
Supplement: s1 [file s1]

# Supplementary Materials: Molecular Mechanisms of Selenium Mitigating Lead Toxicity in Chickens via Mitochondrial Pathway: Selenoproteins, Oxidative Stress, HSPs, and Apoptosis

Weichen Hong, Yuhao Liu, Jiatian Liang, Chunyu Jiang, Meijin Yu, Wei Sun, Bin Huang, Na Dong, Lu Kang and You Tang

**Table S1.** Primer information of detected genes in chicken cerebellum and thalami.

| Genes          | Serial numbers | Primer sequences                                                 |
|----------------|----------------|------------------------------------------------------------------|
| <b>β-actin</b> | L08165         | F: 5'-CCGCTCTATGAAGGCTACGC-3' R: 5'-CTC TCG GCT GTG GTGGTG AA-3' |
| Txnrd1         | NM_001030762.2 | F: 5'-TACGCCTCTGGGAAATTCGT-3' R: 5'-CTTGCAAGGCTTGTCCTAGTA-3'     |
|                |                | F: 5'-                                                           |
| Txnrd2         | NM_001122691.1 | GCTCTTAAAGATGCCAGCACTAC- R: 5'-GAACAGCTTGAGCCATCACAGA-3'         |
|                |                | 3'                                                               |
| Txnrd3         | NM_001122777.1 | F: 5'-CCTGGCAAACGCTAGTTGTG- R: 5'-CGCACCATTACTGTGACATCTAGAC-3'   |
|                |                | 3'                                                               |
|                |                | F: 5'-                                                           |
| HSP27          | NM_205290      | ACACGAGGAGAAACAGGATGAG-3' R: 5'- ACTGGATGGCTGGCTTGG-3'           |
| HSP40          | NM_001199325   | F: 5'- GGGCATTCAACAGCATAGA-3' R: 5'- TTCACATCCCCAAGTTTAGG-3'     |
| HSP70          | NM_001006685   | F: 5'- CGGGCAAGTTTGACCTAA-3 R: 5'- TTGGCTCCCACCCTATCTCT-3'       |
| HSP90          | NM_001109785   | F: 5'- TCCTGTCCTGGCTTTAGTTT-3' R: 5'-AGGTGGCATCTCCTCGGT-3'       |
| Bcl-2          | NM_205339.1    | F: 5'-ATCGTCGCCTTCTTCGAGTT-3' R: 5'-ATCCCATCCTCCGTTGTCCT-3'      |
|                |                | F: 5'-                                                           |
| p53            | NM_205264.1    | GAGATGCTGAAGGAGATCAATGAG R: 5'-GTGGTCAGTCCGAGCCTTTT-3'           |
|                |                | -3'                                                              |
| Bax            | FJ977571.1     | F: 5'-GATGAAGCCACCCAGCAGTA- R: 5'-TGGATTCTCACAGTAGGAGGATG-3'     |
|                |                | 3'                                                               |
| Cyt c          | K02303.1       | F: 5'-AGGCAAGCACAAGACTGGA-3' R: 5'-CTGACTATCACCAAGAACCACC-3'     |
| Caspase-3      | NM_204725.1    | F: 5'-CATCTGCATCCGTGCCTGA-3' R: 5'-CTCTCGGCTGTGGTGGTGAA-3'       |

**Table S2.** Component matrix of seventeen factors in chicken cerebellums and thalami.

|            | Facto<br>rs | H <sub>2</sub> O <sub>2</sub> | CAT    | SO<br>D | GPx    | GST    | Bcl-2  | p53    | Bax   | Cyt c  | Caspas<br>e-3 | Txnrd<br>1 | Txnrd<br>2 | Txnrd<br>3 | HSP2<br>7 | HSP7<br>0 | HSP9<br>0 |
|------------|-------------|-------------------------------|--------|---------|--------|--------|--------|--------|-------|--------|---------------|------------|------------|------------|-----------|-----------|-----------|
| cerebellum | PC1         | -0.902                        | 0.96   | 0.944   | 0.974  | 0.949  | 0.975  | -0.974 | -0.93 | -0.973 | -0.984        | 0.949      | 0.97       | 0.951      | -0.986    | -0.947    | -0.936    |
| thalamus   | PC1         | 0.911                         | -0.913 | -0.866  | -0.919 | -0.943 | -0.957 | 0.962  | 0.982 | 0.961  | 0.973         | -0.969     | -0.976     | -0.962     | 0.981     | 0.986     | 0.983     |
